# Supplementary material for: A Multidimensional Tool Based on the eHealth Literacy Framework: Development and Initial Validity Testing of the eHealth Literacy Questionnaire (eHLQ)
Source: PubMed Central journal article supplement (PMC5826975; doi:10.2196/jmir.8371), 2018-02-12
Supplement: jmir_v20i2e36_app1.pdf [file jmir_v20i2e36_app1.pdf]

## Multi-media Appendix 1

*Fit statistics and summary model parameters for six Bayesian Structural Equation models with varying prior variances for cross-loadings and correlated residuals – Model 3 chosen as a satisfactory solution*

| Model parameter                        | Model 1<br>0.01/300* | Model 2<br>0.02/300 | Model 3<br>0.01/200 | Model 4<br>0.02/200 | Model 5<br>0.01/100 | Model 6<br>0.02/100 |
|----------------------------------------|----------------------|---------------------|---------------------|---------------------|---------------------|---------------------|
| Posterior Predictive P Value (PPP)     | 0.058                | 0.084               | 0.265               | 0.304               | 0.615               | 0.634               |
| 95% CIs for $\chi^2$ Difference        | -20.39 –<br>190.22   | -30.22 –<br>180.61  | -68.68 –<br>133.82  | -75.02 –<br>127.32  | -117.22 –<br>85.98  | -121.81 –<br>81.58  |
| Prior-posterior P-value (PPPP)         |                      |                     | 0.782               | 0.861               |                     |                     |
| DIC                                    | 32,782.87            | 32,761.43           | 32,765.87           | 32,738.70           | 32,773.99           | 32,750.71           |
| N iterations to PSR consistently <1.05 | 9,900                | 10,100              | 4,900               | 5,000               | 3,800               | 10,300              |
| N iterations to PSR consistently <1.01 | 14,000               | 14,900              | 18,500              | 20,000+             | 20,000+             | 20,000+             |
| N (%) of sig. target loadings          | 35 (100%)            | 35 (100%)           | 35 (100%)           | 35 (100%)           | 35 (100%)           | 35 (100%)           |
| N of sig. cross-loadings               | 0                    | 0                   | 0                   | 0                   | 0                   | 0                   |
| N of sig. correlated residuals         | 30                   | 25                  | 37                  | 31                  | 51                  |                     |
| Range of inter-factor correlations     | 0.30 - 0.96          | 0.28 – 0.96         | 0.31 - 0.95         | 0.29 - 0.95         | 0.34– 0.95          |                     |

PPP = Posterior Predictive P Value; PPPP = Prior-posterior Predictive P-value; PSR = Potential Scale Reduction

- = variance of prior for cross-loadings / Inverse Wishart degrees of freedom for residual correlations
