# Supplementary material for: A Multidimensional Tool Based on the eHealth Literacy Framework: Development and Initial Validity Testing of the eHealth Literacy Questionnaire (eHLQ)
Source: PubMed Central journal article supplement (PMC5826975; doi:10.2196/jmir.8371), 2018-02-12
Supplement: jmir_v20i2e36_app3.pdf [file jmir_v20i2e36_app3.pdf]

## Multimedia Appendix 3:

*The estimated item locations, item discriminations, and factor loadings.*

| Item number                                                   |  | Item location (95% CI) | Factor loading | Item discrimination (95% CI) |
|---------------------------------------------------------------|--|------------------------|----------------|------------------------------|
| <i>1. Using technology to process health information</i>      |  |                        |                |                              |
| 7                                                             |  | 2.04 (1.61-2.46)       | 0.77           | 2.12 (1.61-2.64)             |
| 11                                                            |  | 0.69 (0.32-1.05)       | 0.80           | 2.33 (1.73-2.93)             |
| 13                                                            |  | 0.25 (-0.14 to 0.64)   | 0.64           | 2.07 (1.59-2.56)             |
| 20                                                            |  | -2.16 (-2.79 to -1.53) | 0.52           | 1.07 (0.81-1.32)             |
| 25                                                            |  | -0.97 (-1.43 to -0.51) | 0.57           | 1.53 (1.17-1.88)             |
| <i>Composite scale reliability (95% CIs) 0.84 (0.81-0.87)</i> |  |                        |                |                              |
| <i>Cronbach alpha .84</i>                                     |  |                        |                |                              |
| <i>2. Understanding of health concepts and language</i>       |  |                        |                |                              |
| 5                                                             |  | 2.35 (1.73-2.98)       | 0.60           | 1.36 (1.01-1.71)             |
| 12                                                            |  | 2.37 (1.89-2.84)       | 0.80           | 2.68 (1.86-3.50)             |
| 15                                                            |  | 1.53 (1.05-2.01)       | 0.62           | 1.79 (1.32-2.26)             |
| 21                                                            |  | 3.27 (2.54-4.01)       | 0.60           | 1.45 (1.08-1.83)             |
| 26                                                            |  | 2.31 (1.61-3.01)       | 0.43           | 1.03 (0.75-1.31)             |
| <i>Composite scale reliability (95% CIs) 0.75 (0.75-0.82)</i> |  |                        |                |                              |
| <i>Cronbach alpha .77</i>                                     |  |                        |                |                              |
| <i>3. Ability to actively engage with digital services</i>    |  |                        |                |                              |
| 4                                                             |  | 1.88 (1.43- 2.33)      | 0.76           | 2.07 (1.59-2.55)             |
| 6                                                             |  | 1.57 (1.18-1.96)       | 0.84           | 3.07 (2.29-3.86)             |
| 8                                                             |  | 0.51 (-0.02-1.03)      | 0.51           | 0.93 (0.70-1.15)             |
| 17                                                            |  | 1.34 (0.94-1.74)       | 0.78           | 2.61 (1.97-3.24)             |
| 32                                                            |  | 0.54 (0.12-0.97)       | 0.60           | 1.97 (1.51-2.43)             |
| <i>Composite scale reliability (95% CIs) 0.86 (0.83-0.88)</i> |  |                        |                |                              |
| <i>Cronbach alpha .86</i>                                     |  |                        |                |                              |
| <i>4. Feel safe and in control</i>                            |  |                        |                |                              |
| 1                                                             |  | 0.90 (0.51-1.29)       | 0.81           | 2.49 (1.92-3.06)             |
| 10                                                            |  | 0.40 (0.04-0.76)       | 0.83           | 3.47 (2.58-4.35)             |
| 14                                                            |  | -0.78 (-1.34 to        | 0.43           | 1.05 (0.80-1.29)             |

|                                                               |  |                        |      |                  |
|---------------------------------------------------------------|--|------------------------|------|------------------|
|                                                               |  | -0.23)                 |      |                  |
| 22                                                            |  | 0.12 (-0.25 to 0.49)   | 0.82 | 2.56 (1.96-3.15) |
| 30                                                            |  | 0.97 (0.55-1.39)       | 0.71 | 2.10 (1.63-2.58) |
| <i>Composite scale reliability (95% CIs) 0.87 (0.84-0.89)</i> |  |                        |      |                  |
| <i>Cronbach alpha .86</i>                                     |  |                        |      |                  |
| <i>5. Motivated to engage with digital services</i>           |  |                        |      |                  |
| 2                                                             |  | 0.13 (-0.37 to 0.62)   | 0.68 | 1.13 (0.86-1.40) |
| 19                                                            |  | -0.16 (-0.56 to 0.29)  | 0.79 | 2.19 (1.64-2.75) |
| 24                                                            |  | -0.50 (-0.92 to -0.75) | 0.67 | 2.17 (1.65-2.69) |
| 27                                                            |  | 0.20 (-0.20 to 0.59)   | 0.63 | 2.38 (1.76-2.99) |
| 35                                                            |  | 1.05 (0.61-1.49)       | 0.71 | 1.86 (1.41-2.30) |
| <i>Composite scale reliability (95% CIs) 0.84 (0.81-0.87)</i> |  |                        |      |                  |
| <i>Cronbach alpha .85</i>                                     |  |                        |      |                  |
| <i>6. Access to digital services that work</i>                |  |                        |      |                  |
| 3                                                             |  | 2.16 (1.14-3.17)       | 0.59 | 0.55 (0.37-0.73) |
| 9                                                             |  | 0.21 (-0.30 to 0.72)   | 0.44 | 1.20 (0.89-1.50) |
| 16                                                            |  | 0.23 (-0.35 to 0.81)   | 0.43 | 0.86 (0.63-1.09) |
| 23                                                            |  | -3.43 (-4.53 to -2.32) | 0.54 | 0.79 (0.56-1.02) |
| 29                                                            |  | -0.47 (-0.92 to -0.01) | 0.65 | 1.91 (1.43-2.39) |
| 34                                                            |  | 0.16 (-0.21 to 0.53)   | 0.75 | 3.22 (2.15-4.29) |
| <i>Composite scale reliability (95% CIs) 0.77 (0.73-0.81)</i> |  |                        |      |                  |
| <i>Cronbach alpha .77</i>                                     |  |                        |      |                  |
| <i>7. Digital services that suit individual needs</i>         |  |                        |      |                  |
| 18                                                            |  | -1.00 (-1.46 to -0.55) | 0.75 | 2.01 (1.54-2.49) |
| 28                                                            |  | -1.10 (-1.53 to -0.67) | 0.79 | 3.14 (2.32-3.96) |
| 31                                                            |  | -0.15 (-0.57 to 0.27)  | 0.72 | 2.64 (2.00-3.29) |
| 33                                                            |  | 0.17 (-0.23 to 0.56)   | 0.75 | 2.45 (1.82-3.07) |
| <i>Composite scale reliability (95% CIs) 0.85 (0.82-0.88)</i> |  |                        |      |                  |
| <i>Cronbach alpha .85</i>                                     |  |                        |      |                  |
