# Supplementary material for: A Multidimensional Tool Based on the eHealth Literacy Framework: Development and Initial Validity Testing of the eHealth Literacy Questionnaire (eHLQ)
Source: PubMed Central journal article supplement (PMC5826975; doi:10.2196/jmir.8371), 2018-02-12

# 1. Using technology process health information

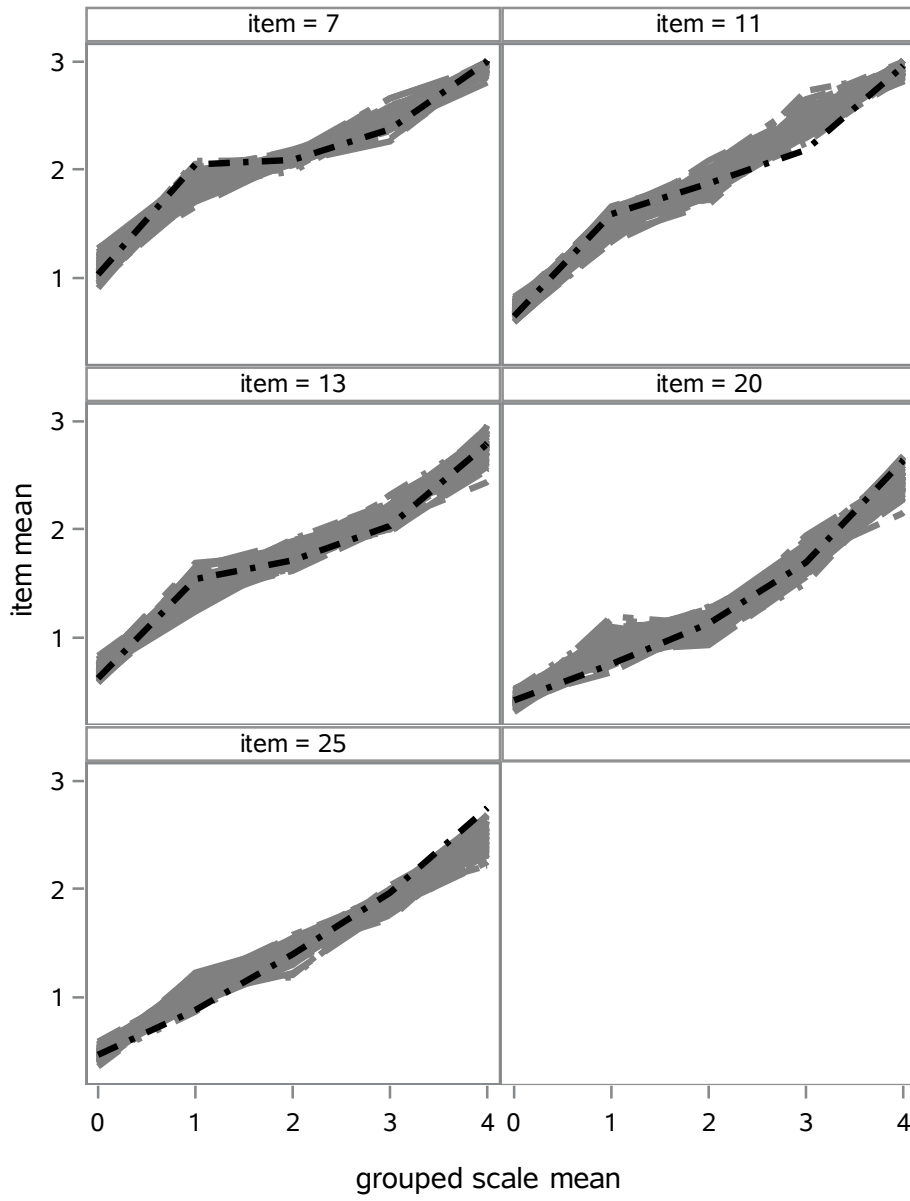

## 2. Understanding of health concepts and language

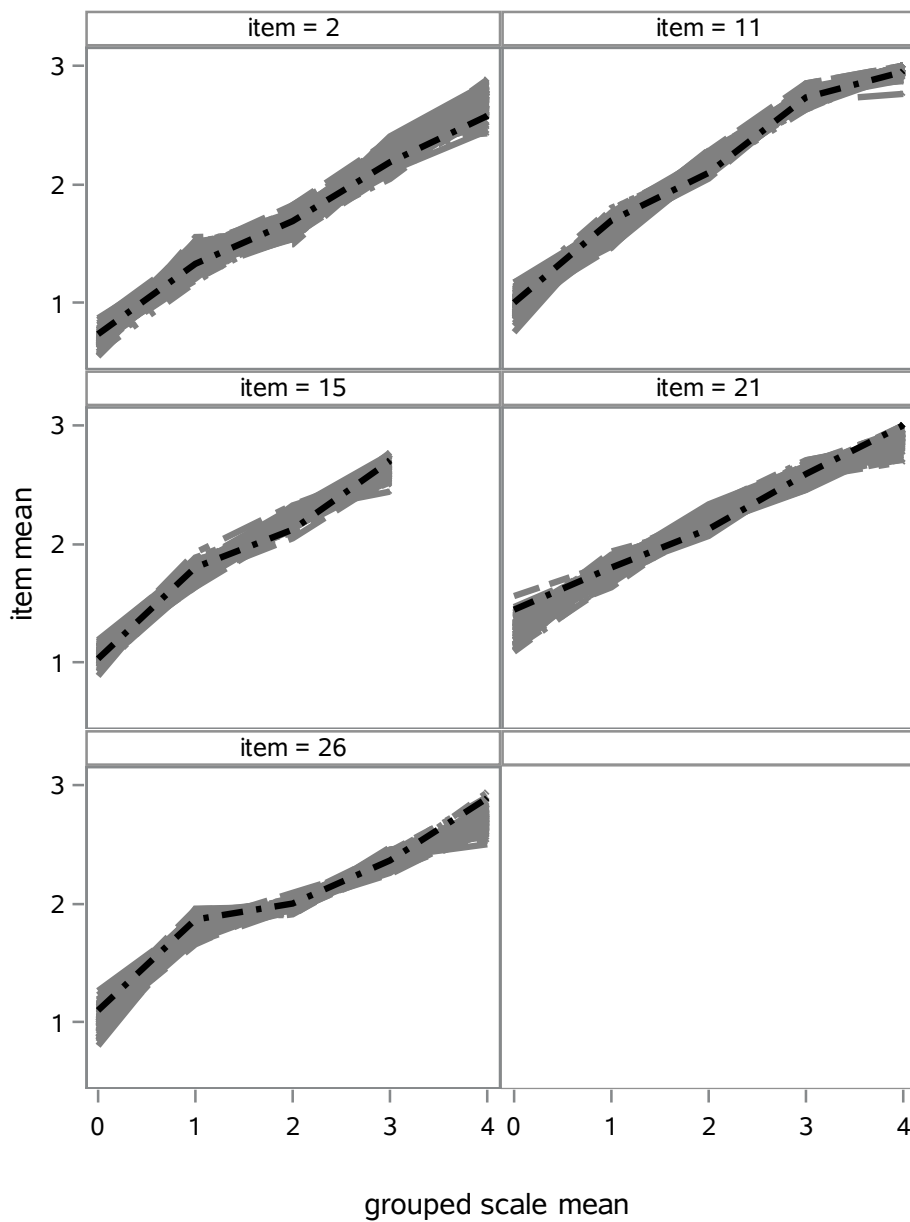

### 3. Ability to actively engage with digital services

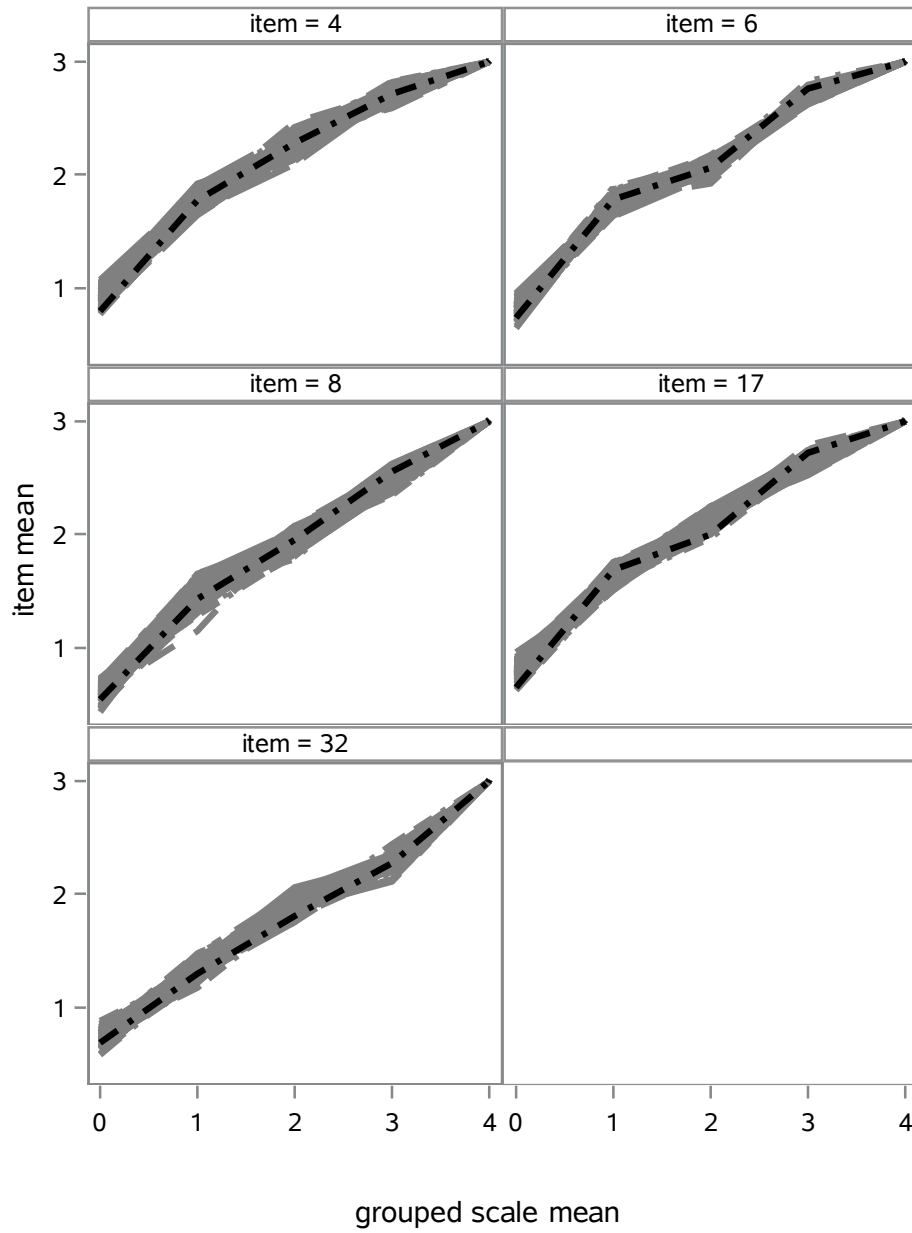

#### 4. Feel safe and in control

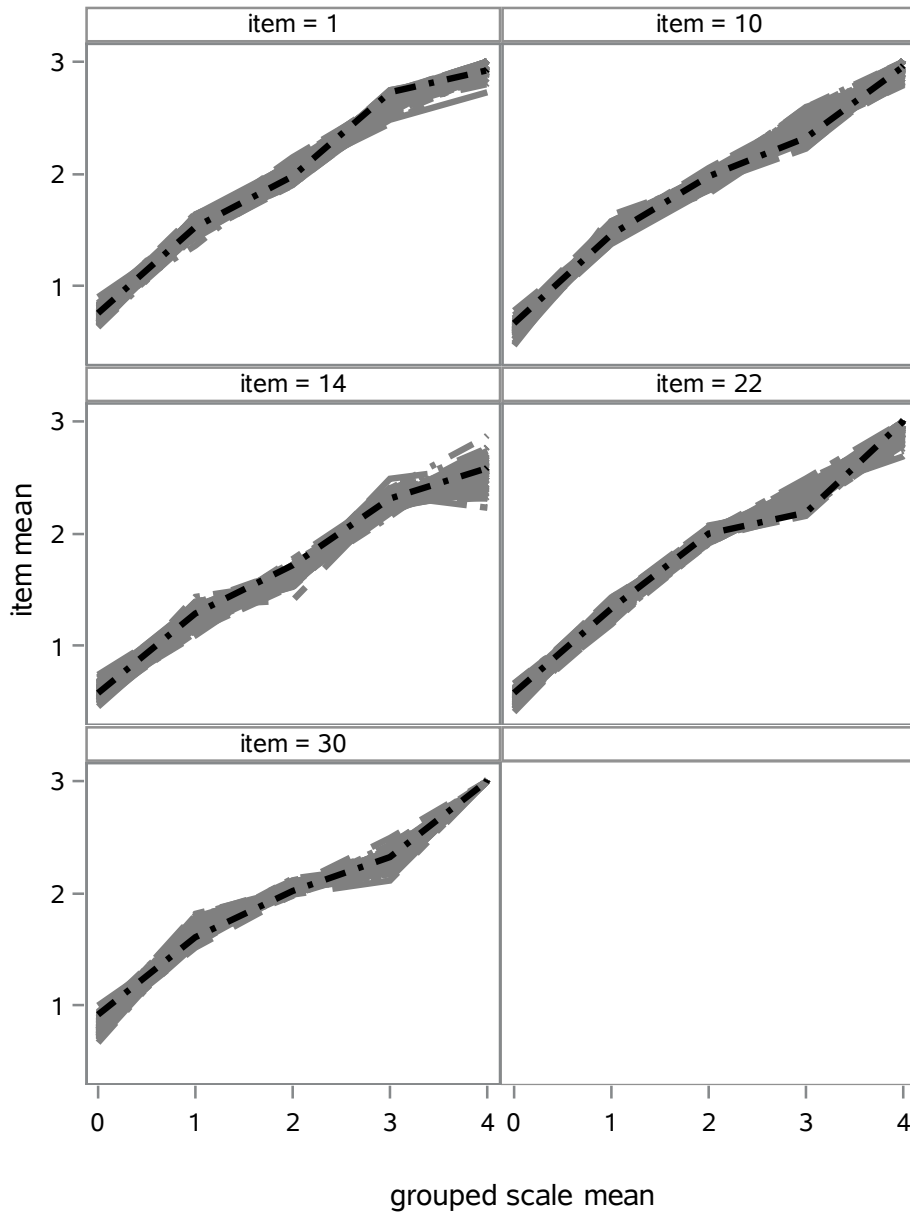

### 5. Motivated to engage with digital services

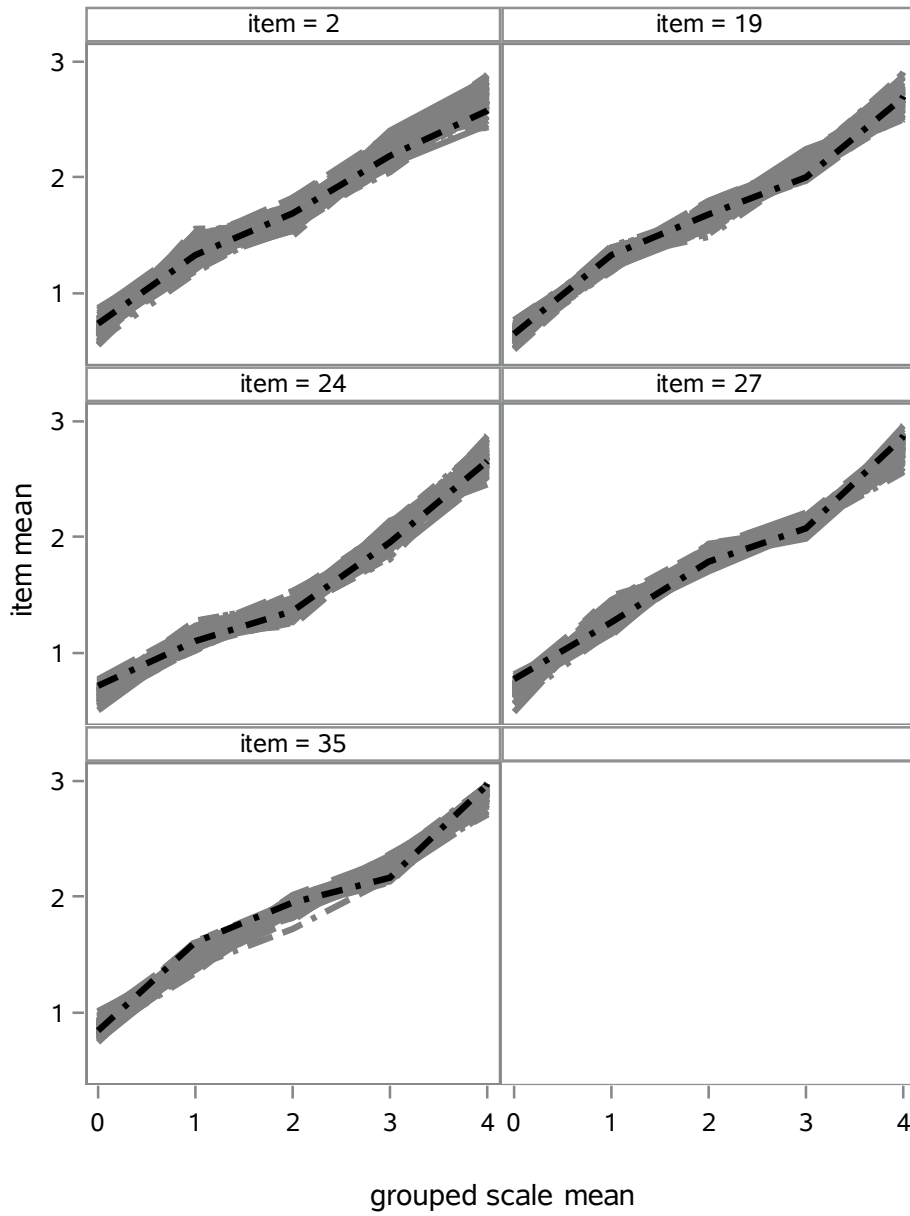

### 6. Access to digital services that work

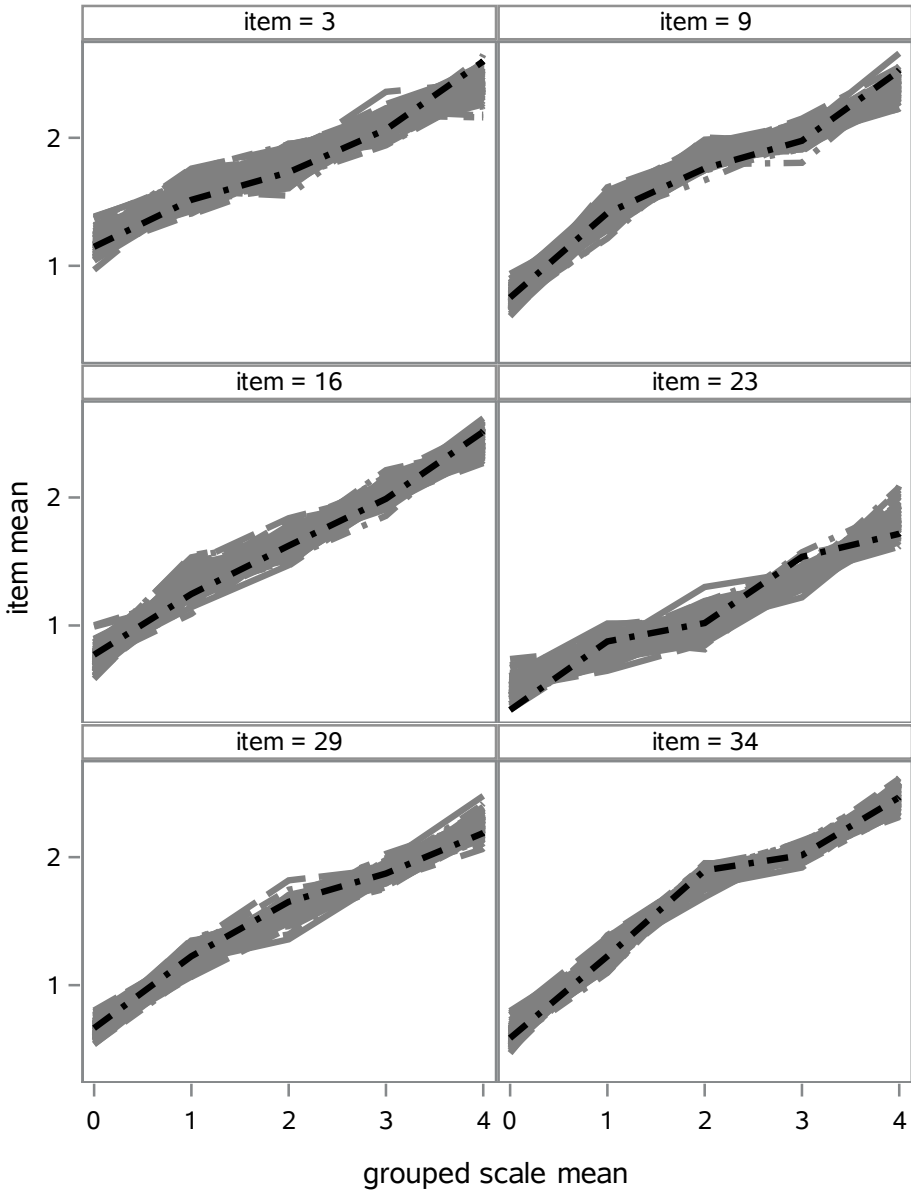

### 7. Digital services that suit individual needs

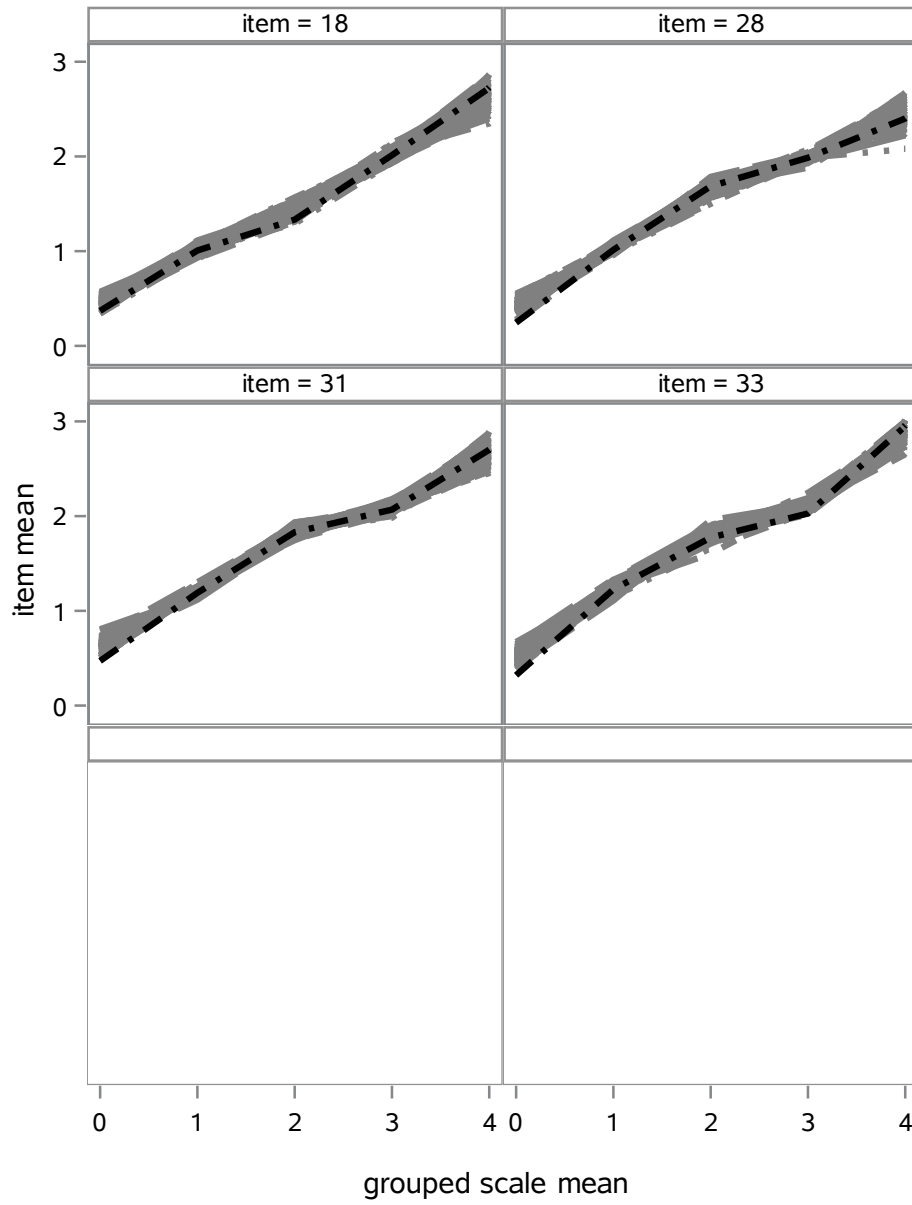

Supplement: jmir_v20i2e36_app4.pdf [file jmir_v20i2e36_app4.pdf]
